# Supplementary material for: Evidence of sociodemographic heterogeneity across the HIV treatment cascade and progress towards 90‐90‐90 in sub‐Saharan Africa – a systematic review and meta‐analysis
Source: PubMed Central journal article supplement (PMC7062634; doi:10.1002/jia2.25470), 2020-03-09
Supplement: JIA2-23-e25470-s002.pdf [file JIA2-23-e25470-s002.pdf]

## Additional File 2: Studies of demographic heterogeneity of 90-90-90 which met inclusion criteria

| First author<br>(publication year)    | Country(s)           | Study period           | Study design | Sampling design | Sample size | Outcome(s) Reported |         |                   |      | Outcome(s) Stratified by: |        |           |                  |                     |          |            |
|---------------------------------------|----------------------|------------------------|--------------|-----------------|-------------|---------------------|---------|-------------------|------|---------------------------|--------|-----------|------------------|---------------------|----------|------------|
|                                       |                      |                        |              |                 |             | Awareness           | ART Use | Viral Suppression | PWVS | Age                       | Gender | Education | Income or wealth | Relationship status | Mobility | Occupation |
| <b>Peer-reviewed literature</b>       |                      |                        |              |                 |             |                     |         |                   |      |                           |        |           |                  |                     |          |            |
| ME. Charurat (2015) <sup>1</sup>      | Nigeria              | Mar. 2013 - Aug. 2014  | C            | RDS             | 186         |                     | X       | X                 |      | X                         |        | X         |                  | X                   |          | X          |
| L. Myer (2015) <sup>2</sup>           | South Africa         | Apr. 2013 - Jun. 2014  | CS           | CFB             | 1521        |                     | X       | X                 |      | X                         |        | X         |                  | X                   |          | X          |
| NE. Rosenberg (2015) <sup>3</sup>     | Malawi               | Mar. 2014 - Oct. 2014  | RCT          | CFB             | 200         | X                   |         |                   |      |                           |        |           |                  |                     |          |            |
| JM. Baeten (2016) <sup>4</sup>        | Kenya, Uganda        | Nov. 2012 - Aug. 2014  | C            | CB              | 1013        |                     |         |                   | X    |                           |        |           |                  |                     |          |            |
| RV. Barnabas (2016) <sup>5</sup>      | South Africa, Uganda | Jun. 2013 - Feb. 2015  | RCT          | CB              | 15322       | X                   | X       | X                 |      |                           |        |           |                  |                     |          |            |
| S. Boyer (2016) <sup>6</sup>          | South Africa         | 2012 - 2015            | RCT          | PB              | 514         |                     | X       |                   |      | X                         | X      | X         | X                | X                   |          | X          |
| MM. Chanda (2017) <sup>7</sup>        | Zambia               | Sept. 2016 - Oct. 2016 | RCT          | CB              | 965         |                     | X       |                   |      |                           |        |           |                  |                     |          |            |
| SE. Collins (2016) <sup>8</sup>       | Rwanda               | Apr. 2014 - Sept. 2014 | RCT          | CFB             | 150         |                     |         | X                 |      | X                         | X      |           |                  |                     |          |            |
| T. Gaolathe (2016) <sup>9</sup>       | Botswana             | Oct. 2013 - Nov. 2015  | RCT          | PB              | 3596        | X                   | X       | X                 | X    | X                         | X      | X         | X                | X                   | X        | X          |
| A. Grobler (2017) <sup>10</sup>       | South Africa         | Jun. 2014 - Jun. 2015  | CS           | PB              | 9812        | X                   | X       | X                 | X    | X                         | X      |           | X                | X                   |          |            |
| KE. Lancaster (2016) <sup>11</sup>    | Malawi               | Jul. 2014 - Sep. 2014  | CS           | VB              | 138         | X                   |         |                   |      |                           |        |           |                  |                     |          |            |
| J. Manne-Goehler (2016) <sup>12</sup> | South Africa         | Nov. 2014 - Nov. 2015  | C            | CB              | 4767        |                     | X       |                   |      |                           |        |           |                  |                     |          |            |
| T. Nakanyala (2016) <sup>13</sup>     | Namibia              | Dec. 2014 - Jul. 2015  | CS           | CB              | 2163        | X                   | X       | X                 | X    | X                         | X      |           |                  |                     |          |            |
| A. Rao (2016) <sup>14</sup>           | South Africa         | Oct. 2014 - Apr. 2015  | CS           | RDS             | 391         | X                   |         |                   |      | X                         |        | X         | X                | X                   |          |            |
| S. Stahlman (2016) <sup>15</sup>      | Lesotho              | Feb. 2014 - Jun. 2014  | CS           | RDS             | 318         | X                   |         |                   |      |                           |        |           |                  |                     |          |            |
| S. Ahmed (2017) <sup>16</sup>         | Malawi               | Jul. 2014 - Apr. 2015  | C            | CB              | 711         | X                   | X       |                   |      | X                         |        |           |                  |                     |          |            |
| S. Asimwe (2017) <sup>17</sup>        | Uganda               | Oct. 2015 - Mar. 2016  | CS           | CB              | 43696       |                     | X       |                   |      |                           |        |           |                  |                     |          |            |
| B. Elul (2017) <sup>18</sup>          | Mozambique           | Apr. 2013 - Jun. 2016  | RCT          | CFB             | 2004        |                     | X       |                   |      |                           |        |           |                  |                     |          |            |
| AG. Flynn (2017) <sup>19</sup>        | Uganda               | 2006 - 2016            | C            | CFB             | 1353        | X                   | X       |                   |      |                           |        |           |                  |                     |          |            |
| MK. Grabowski (2017) <sup>20</sup>    | Uganda               | Apr. 1999 - Sep. 2016  | C            | PB              | 33937       |                     | X       |                   | X    |                           | X      |           |                  |                     |          |            |
| R. Hayes (2017) <sup>21</sup>         | Zambia               | Dec. 2013 - Jun. 2015  | RCT          | PB              | 101102      | X                   | X       |                   |      | X                         | X      |           |                  |                     |          |            |
| CJ. Hoffmann (2017) <sup>22</sup>     | South Africa         | Mar. 2013 - Oct. 2014  | RCT          | CFB             | 2558        |                     | X       |                   |      |                           |        |           |                  |                     |          |            |
| D. Kerrigan (2017) <sup>23</sup>      | Tanzania             | Oct. 2015-Apr. 2016    | CS           | VB              | 496         | X                   | X       | X                 | X    | X                         |        | X         |                  | X                   | X        | X          |
| A. Laher (2017) <sup>24</sup>         | South Africa         | Mar. 2016-Aug. 2016    | C            | CFB             | 159         |                     |         | X                 |      |                           |        |           |                  |                     |          |            |

| First author<br>(publication year)   | Country(s)                                                     | Study period                                    | Study design | Sampling design | Sample size | Outcome(s) Reported |         |                   |      | Outcome(s) Stratified by: |        |           |                  |                     |          |            |
|--------------------------------------|----------------------------------------------------------------|-------------------------------------------------|--------------|-----------------|-------------|---------------------|---------|-------------------|------|---------------------------|--------|-----------|------------------|---------------------|----------|------------|
|                                      |                                                                |                                                 |              |                 |             | Awareness           | ART Use | Viral Suppression | PWVS | Age                       | Gender | Education | Income or wealth | Relationship status | Mobility | Occupation |
| CE. Lyons (2017) <sup>25</sup>       | Senegal                                                        | Sep. 2013 - Sep. 2016                           | C            | RDS             | 1482        | X                   | X       | X                 |      |                           |        |           |                  |                     |          |            |
| R. Mafigiri (2017) <sup>26</sup>     | Uganda                                                         | 2013 - 2014                                     | CS           | CB              | 792         |                     | X       |                   |      |                           | X      |           |                  |                     |          |            |
| B. Myburgh (2017) <sup>27</sup>      | South Africa                                                   | Oct. 2013 - Jun. 2014                           | CS           | CFB             | 100         |                     | X       |                   |      |                           |        |           |                  |                     |          |            |
| K. Ortblad (2017) <sup>28</sup>      | Uganda                                                         | Oct. 2016 - 2017                                | RCT          | CB              | 960         |                     | X       |                   |      |                           |        |           |                  |                     |          |            |
| M. Petersen (2017) <sup>29</sup>     | Kenya, Uganda                                                  | Jun. 2013 - Jun. 2016                           | RCT          | PB              | 77774       | X                   | X       | X                 | X    | X                         | X      | X         | X                | X                   | X        | X          |
| S. Phiri (2017) <sup>30</sup>        | Malawi                                                         | Nov. 2013 - Nov. 2014                           | RCT          | CFB             | 1269        |                     | X       | X                 |      |                           |        |           |                  |                     |          |            |
| NE. Rosenberg (2017) <sup>31</sup>   | Malawi                                                         | Dec. 2015 - Aug. 2016                           | C            | CFB             | 137         | X                   |         |                   |      |                           |        |           |                  |                     |          |            |
| EC. Ruria (2017) <sup>32</sup>       | Kenya                                                          | Jul. 2015 - Dec. 2016                           | C            | CFB             | 952         |                     | X       |                   |      |                           |        |           |                  |                     |          |            |
| E. Ruzagira (2017) <sup>33</sup>     | Uganda                                                         | Mar. 2015 - Mar. 2016                           | RCT          | CB              | 412         | X                   | X       |                   |      |                           |        |           |                  |                     |          |            |
| S. Schwartz (2017) <sup>34</sup>     | South Africa                                                   | Oct. 2014 - Apr. 2015                           | CS           | RDS             | 410         | X                   | X       | X                 |      |                           |        |           |                  |                     |          |            |
| A. Vos (2017) <sup>35</sup>          | South Africa                                                   | Apr. - May 2016                                 | CS           | CB              | 201         |                     | X       |                   |      |                           |        |           |                  |                     |          |            |
| L. Vu (2017) <sup>36</sup>           | Uganda                                                         | Oct. 2014 - Sep. 2015                           | C            | CB              | 473         |                     | X       |                   |      |                           |        |           |                  |                     |          |            |
| K. Brown (2018) <sup>37</sup>        | Zimbabwe, Malawi, Zambia, Uganda, Swaziland, Tanzania, Lesotho | 2015 - 2017                                     | CS           | PB              | 28152       | X                   | X       | X                 | X    |                           |        |           |                  |                     |          |            |
| MB. Chagomerana (2018) <sup>38</sup> | Malawi                                                         | Jun. 2015 - Nov. 2016                           | C            | CFB             | 299         |                     |         | X                 |      |                           | X      |           | X                |                     |          |            |
| RKD. Ephraim (2018) <sup>39</sup>    | Ghana                                                          | Jan. 2014 - Apr. 2014                           | CC           | CFB             | 110         |                     | X       |                   |      | X                         | X      |           |                  |                     |          |            |
| B. Hansoti (2018) <sup>40</sup>      | South Africa                                                   | Sep. 2016 - Nov. 2016                           | CS           | CFB             | 1714        | X                   |         |                   |      |                           | X      |           |                  |                     |          |            |
| B. Hansoti (2018) <sup>41</sup>      | South Africa                                                   | Sep. 2016 - Nov. 2016                           | CS           | CFB             | 2100        |                     |         | X                 |      |                           | X      |           |                  |                     |          |            |
| CB. Holmes (2018) <sup>42</sup>      | Zambia                                                         | Aug. 2013 - Jul. 2015                           | CS           | CFB             | 165464      |                     | X       |                   |      |                           | X      |           |                  |                     |          |            |
| F. Moyo (2018) <sup>43</sup>         | South Africa                                                   | May 2016 - Sep. 2016                            | CS           | CFB             | 367         |                     | X       | X                 |      | X                         |        |           |                  |                     |          |            |
| A. Mujugira (2018) <sup>44</sup>     | Kenya, Uganda                                                  | Nov. 2012 - Jun. 2016                           | RCT          | CFB             | 904         |                     |         | X                 |      |                           | X      |           |                  |                     |          |            |
| CM. North (2018) <sup>45</sup>       | Uganda                                                         | Dec. 2013 - Dec. 2018                           | C            | CFB             | 269         |                     |         | X                 |      |                           |        |           |                  |                     |          |            |
| S. Okawa (2018) <sup>46</sup>        | Zambia                                                         | Apr. 2014 - Jul. 2014                           | CS           | CFB             | 175         |                     | X       |                   |      |                           | X      |           |                  |                     |          |            |
| J. Ousley (2018) <sup>47</sup>       | Kenya, Democratic Republic of Congo                            | Jan. - Mar. 2015 (Kenya), May - Jul. 2017 (DRC) | CS           | CFB             | 707         |                     | X       | X                 |      | X                         | X      |           |                  |                     |          |            |
| M. Seyoum (2018) <sup>48</sup>       | Ethiopia                                                       | Feb. 2017 - May 2017                            | CS           | CFB             | 200         |                     | X       |                   |      | X                         | X      | X         |                  | X                   |          |            |
| JO. Ugboaja (2018) <sup>49</sup>     | Nigeria                                                        | Jan. 2016 - Jan. 2017                           | CS           | CFB             | 110         |                     | X       |                   |      |                           |        |           |                  |                     |          |            |
| Y. Zhang (2018) <sup>50</sup>        | Kenya, Malawi, South Africa                                    | Jul. 2015 - Apr. 2018                           | RCT          | CFB             | 183         |                     | X       |                   |      | X                         | X      |           |                  |                     | X        |            |

| First author<br>(publication year)   | Country(s)                               | Study period          | Study design | Sampling design | Sample size | Outcome(s) Reported |         |                   |      | Outcome(s) Stratified by: |        |           |                  |                     |          |
|--------------------------------------|------------------------------------------|-----------------------|--------------|-----------------|-------------|---------------------|---------|-------------------|------|---------------------------|--------|-----------|------------------|---------------------|----------|
|                                      |                                          |                       |              |                 |             | Awareness           | ART Use | Viral Suppression | PWVS | Age                       | Gender | Education | Income or wealth | Relationship status | Mobility |
| <b>Grey literature</b>               |                                          |                       |              |                 |             |                     |         |                   |      |                           |        |           |                  |                     |          |
| RA. Ayanga (2015) <sup>51</sup>      | Uganda                                   | Nov. 2014 - Jan. 2015 | C            | CFB             | 1008        |                     |         | X                 |      |                           |        |           |                  |                     |          |
| V. Jain (2015) <sup>52</sup>         | Uganda                                   | 2014                  | CS           | CB              | 4897        |                     |         |                   | X    |                           |        |           |                  |                     |          |
| J. Rhein (2015) <sup>53</sup>        | Uganda                                   | Aug. 2013 - Aug. 2014 | C            | CFB             | 165         |                     | X       |                   |      |                           |        |           |                  |                     |          |
| SR. Schwartz (2015) <sup>54</sup>    | South Africa                             | Jul. 2013 - Sep. 2014 | C            | CFB             | 126         |                     | X       | X                 |      |                           |        |           |                  |                     |          |
| SJ. Aston (2016) <sup>55</sup>       | Malawi                                   | May 2013 - Jan. 2015  | C            | CFB             | 459         | X                   | X       |                   |      |                           |        |           |                  |                     |          |
| I. Casavant (2016) <sup>56</sup>     | Mozambique                               | 2014 - 2015           | CS           | PB              | 25344       | X                   |         |                   |      |                           |        |           |                  |                     |          |
| A Kharsany (2016) <sup>57</sup>      | South Africa                             | 2014 - 2015           | CS           | CB              | 9812        |                     |         |                   | X    | X                         | X      |           |                  |                     |          |
| M. Lahuerta (2016) <sup>58</sup>     | Mali                                     | Oct. 2014 - Feb. 2015 | CS           | RDS             | 552         | X                   | X       |                   |      |                           |        |           |                  |                     |          |
| WB. MacLeod (2016) <sup>59</sup>     | South Africa                             | Apr. 2014 - Mar. 2015 | CS           | CFB             | 2199890     |                     |         | X                 |      |                           |        |           |                  |                     |          |
| PHIA (2016) <sup>60</sup>            | Malawi                                   | Nov. 2015 - Aug. 2016 | CS           | PB              | NA          | X                   | X       | X                 | X    | X                         | X      |           |                  |                     |          |
| PHIA (2016) <sup>61</sup>            | Tanzania                                 | Oct. 2016 - Aug. 2017 | CS           | PB              | NA          | X                   | X       | X                 | X    | X                         | X      |           |                  |                     |          |
| PHIA (2016) <sup>62</sup>            | Uganda                                   | Aug. 2016 - Mar. 2017 | CS           | PB              | NA          | X                   | X       | X                 | X    | X                         | X      |           |                  |                     |          |
| PHIA (2016) <sup>63</sup>            | Zambia                                   | Mar. 2016 - Aug. 2016 | CS           | PB              | NA          | X                   | X       | X                 | X    | X                         | X      |           |                  |                     |          |
| PHIA (2016) <sup>64</sup>            | Zimbabwe                                 | Oct. 2015 - Aug. 2016 | CS           | PB              | NA          | X                   | X       | X                 | X    |                           |        |           |                  |                     |          |
| M. Ribakare (2016) <sup>65</sup>     | Rwanda                                   | Jan. 2014 - Dec. 2014 | CS           | CFB             | 117226      |                     |         | X                 |      |                           |        |           |                  |                     |          |
| B. Tippett Barr (2016) <sup>66</sup> | Malawi                                   | Sep. 2013 – Sep. 2016 | C            | CFB             | 1851        | X                   | X       |                   |      |                           |        |           |                  |                     |          |
| L. Abuogi (2017) <sup>67</sup>       | Kenya                                    | Sep. 2014 - Feb. 2016 | C            | CFB             | 164         |                     | X       | X                 |      |                           |        |           |                  |                     |          |
| G. Breton (2017) <sup>68</sup>       | Burundi, Cameroon, Guinea, Cote d'Ivoire | Aug. 2014 - Mar. 2016 | C            | CFB             | 31286       |                     |         | X                 |      |                           |        |           |                  |                     |          |
| C. Couderc (2017) <sup>69</sup>      | Mali, Cote d'Ivoire, Togo, Burkina Faso  | Jun. 2015 - Jan. 2017 | C            | CB              | 679         |                     | X       |                   |      |                           |        |           |                  |                     |          |
| AB. Kharsany (2017) <sup>70</sup>    | South Africa                             | Jun. 2014 - Jun. 2016 | CS           | PB              | 9812        |                     | X       | X                 |      |                           | X      |           |                  |                     |          |
| SM. Kiene (2017) <sup>71</sup>       | Uganda                                   | Dec. 2015 – Dec. 2016 | CS           | PB              | 5401        | X                   | X       | X                 | X    |                           |        |           |                  |                     |          |
| T. Malaba (2017) <sup>72</sup>       | South Africa                             | Apr. 2015 - Oct. 2016 | C            | CFB             | 1060        |                     | X       |                   |      |                           |        |           |                  |                     |          |
| SC. Mendelsohn (2017) <sup>73</sup>  | Malawi                                   | Jun. 2014 - Dec. 2014 | C            | VB              | 4166        |                     | X       | X                 |      |                           |        |           |                  |                     |          |
| N. Mutenda (2017) <sup>74</sup>      | Namibia                                  | Jan. 2014 - Mar. 2015 | C            | CFB             | 8366        |                     |         | X                 |      |                           |        |           |                  |                     |          |
| H. Ndagire (2017) <sup>75</sup>      | Uganda                                   | Oct. 2014 - Jun. 2016 | C            | VB              | 2815        |                     | X       | X                 |      |                           |        |           |                  |                     |          |

| First author<br>(publication year)          | Country(s)           | Study period           | Study design | Sampling design | Sample size | Outcome(s) Reported |         |                   |      | Outcome(s) Stratified by: |        |           |                  |                     |          |            |
|---------------------------------------------|----------------------|------------------------|--------------|-----------------|-------------|---------------------|---------|-------------------|------|---------------------------|--------|-----------|------------------|---------------------|----------|------------|
|                                             |                      |                        |              |                 |             | Awareness           | ART Use | Viral Suppression | PWVS | Age                       | Gender | Education | Income or wealth | Relationship status | Mobility | Occupation |
| S. Nicholas (2017) <sup>76</sup>            | Uganda               | Sept. 2013 - Nov. 2016 | C            | CFB             | 9305        |                     |         | X                 |      |                           |        |           |                  |                     |          |            |
| A. Nikuze (2017) <sup>77</sup>              | Kenya                | Feb. 2016 - Jul. 2016  | CS           | CFB             | 3585        | X                   | X       | X                 |      |                           |        |           |                  |                     |          |            |
| M. Nsumba (2017) <sup>78</sup>              | Uganda               | Jan. 2015 - Dec. 2016  | C            | CFB             | 5867        |                     |         | X                 |      | X                         | X      |           |                  |                     |          |            |
| P. Olang'o (2017) <sup>79</sup>             | Kenya                | Nov. 2015 - Sep. 2016  | C            | CFB             | 5290        |                     | X       | X                 |      |                           |        |           |                  |                     |          |            |
| I. Pathmanathan (2017) <sup>80</sup>        | Swaziland            | Jul. 2014 - Sept. 2014 | C            | CFB             | 466         |                     | X       |                   |      |                           |        |           |                  |                     |          |            |
| PHIA (2017) <sup>81</sup>                   | Lesotho              | Nov. 2016 - May 2017   | CS           | PB              | 14028       | X                   | X       | X                 | X    | X                         | X      |           |                  |                     |          |            |
| PHIA (2017) <sup>82</sup>                   | Eswatini             | Aug. 2016 - Mar. 2017  | CS           | PB              | 10879       | X                   | X       | X                 | X    | X                         | X      |           |                  |                     |          |            |
| S. Dadabhai (2018) <sup>83</sup>            | Malawi               | Jan. 2016 - Sep. 2017  | C            | CFB             | 1278        |                     |         | X                 |      |                           |        |           |                  |                     |          |            |
| C. Hoffmann (2018) <sup>84</sup>            | South Africa         | Apr. 2016 - Jun. 2016  | C            | CFB             | 121         | X                   | X       |                   |      |                           |        |           |                  |                     |          |            |
| HSRC (2018) <sup>85</sup>                   | South Africa         | Jan. 2017 - Dec. 2017  | CS           | PB              |             | X                   | X       | X                 | X    | X                         | X      |           |                  |                     |          |            |
| LT. Matthews (2018) <sup>86</sup>           | South Africa, Uganda | 2015 - 2017            | C            | CFB             | 439         |                     |         |                   | X    |                           |        |           |                  |                     |          |            |
| PHIA (2018) <sup>87</sup>                   | Cameroon             | Jul. 2017 - Feb. 2018  | CS           | PB              |             | X                   | X       | X                 | X    | X                         | X      |           |                  |                     |          |            |
| PHIA (2018) <sup>88</sup>                   | Cote d'Ivoire        | Aug. 2017 - Mar. 2018  | CS           | PB              |             | X                   | X       | X                 | X    | X                         | X      |           |                  |                     |          |            |
| PHIA (2018) <sup>89</sup>                   | Namibia              | Jun. - Dec. 2017       | CS           | PB              |             | X                   | X       | X                 | X    | X                         | X      |           |                  |                     |          |            |
| PHIA (2018) <sup>90</sup>                   | Ethiopia             | Oct. 2017 - Apr. 2018  | CS           | PB              |             | X                   | X       | X                 | X    | X                         | X      |           |                  |                     |          |            |
| JT. Price (2018) <sup>91</sup>              | Zambia               | Aug. 2015 - Aug. 2017  | C            | CFB             | 1425        |                     | X       | X                 | X    |                           |        |           |                  |                     |          |            |
| E. Zielinski-Gutierrez (2018) <sup>92</sup> | Kenya                | Aug. 2014 - Mar. 2015  | CS           | CB              | 3462        |                     | X       |                   |      |                           |        |           |                  |                     |          |            |

PHIA: Population-based HIV impact assessment

HSRC: Human sciences research council

Study design: C: Cohort, CS: Cross-sectional, RCT: randomized controlled trial, CC: case-control.

Sample design: RDS: respondent-driven sample, CFB: clinic- or facility-based, CB: community-based, PB: population-based, VB: venue-based

PWVS: Population-wide viral suppression

## References

1. Charurat M, Emmanuel B, Akolo C, Keshinro B, Nowak R, Kennedy S, et al. Uptake of treatment as prevention for HIV and continuum of care among HIV-positive men who have sex with men in Nigeria. *J Acquir Immune Defic Syndr*. 2015;**68**(Suppl 2):S114-23.
2. Myer L, Phillips T, Hsiao N, Zerbe A, Petro G, Bekker L, et al. Plasma viraemia in HIV-positive pregnant women entering antenatal care in South Africa. *J Int AIDS Soc*. 2015;**18**:20045.
3. Rosenberg N, Mtande T, Saidi F, Stanley C, Jere E, Paile L, et al. Recruiting male partners for couple HIV testing and counselling in Malawi's option B+ programme: An unblinded randomised controlled trial. *Lancet HIV*. 2015;**2**(11):e483-91.
4. Baeten J, Heffron R, Kidoguchi L, Mugo N, Katabira E, Bukusi E, et al. Integrated delivery of antiretroviral treatment and pre-exposure prophylaxis to HIV-1-serodiscordant couples: A prospective implementation study in Kenya and Uganda. *PLoS Med*. 2016;**13**(8):e1002099.
5. Barnabas R, van Rooyen H, Tumwesigye E, Brantley J, Baeten J, van Heerden A, et al. Uptake of antiretroviral therapy and male circumcision after community-based HIV testing and strategies for linkage to care versus standard clinic referral: a multisite, open-label, randomised controlled trial in South Africa and Uganda. *Lancet HIV*. 2016;**3**(5):e212-20.
6. Boyer S, Iwuji C, Gosset A, Protopopescu C, Okesola N, Plazy M, et al. Factors associated with antiretroviral treatment initiation amongst HIV-positive individuals linked to care within a universal test and treat programme: early findings of the ANRS 12249 TasP trial in rural South Africa. *AIDS Care*. 2016;**28**(Suppl 3):39-51.
7. Chanda M, Ortblad K, Mwale M, Chongo S, Kanchele C, Kamungoma N, et al. HIV self-testing among female sex workers in Zambia: A cluster randomized controlled trial. *PLoS Med*. 2017;**14**(11):e1002442.
8. Collins S, Grant P, Uwinkindi F, Talbot A, Seruyange E, Slamowitz D, et al. A randomized switch from nevirapine-based antiretroviral therapy to single tablet rilpivirine/emtricitabine/tenofovir disoproxil fumarate in virologically suppressed human immunodeficiency virus-1-infected Rwandans. *Open Forum Infect Dis*. 2016;**3**(3):ofw141.
9. Gaolathe T, Wirth K, Holme M, Makhema J, Moyo S, Chakalisa U, et al. Botswana's progress toward achieving the 2020 UNAIDS 90-90-90 antiretroviral therapy and virological suppression goals: A population-based survey. *Lancet HIV*. 2016 May;**3**(5):e221-30.

10. Grobler A, Cawood C, Khanyile D, Puren A, Kharsany A. Progress of UNAIDS 90-90-90 targets in a district in KwaZulu-Natal, South Africa, with high HIV burden, in the HIPSS study: A household-based complex multilevel community survey. *Lancet HIV*. 2017;**4**(11 PG-505–513):e505–13.
11. Lancaster K, Go V, Lungu T, Mmodzi P, Hosseinipour M, Chadwick K, et al. Substance use and HIV infection awareness among HIV-infected female sex workers in Lilongwe, Malawi. *Int J Drug Policy*. 2016;**30**:124–31.
12. Manne-Goehler J, Montana L, Gomez-Olive X, Wade A, Tollman S, Gaziano T, et al. HIV infection, art use, and access to care for NCDs in Agincourt, South Africa. *Top Antivir Med*. 2016;**24**(E-1):281–2.
13. Nakanyala T, Patel S, Sawadogo S, Maher A, Banda K, Wolkon A, et al. How close to 90-90-90? Measuring undiagnosed HIV infection, ART use and viral suppression in a community-based sample from Namibia's highest prevalence region. In: Proceedings of the 2016 International AIDS Conference. Durban, South Africa; 2016.
14. Rao A, Baral S, Phaswana-Mafuya N, Lambert A, Kose Z, Mcingana M, et al. Pregnancy intentions and safer pregnancy knowledge among female sex workers in Port Elizabeth, South Africa. *Obs Gynecol*. 2016;**128**(1):15–21.
15. Stahlman S, Johnston L, Yah C, Ketende S, Maziya S, Trapence G, et al. Respondent-driven sampling as a recruitment method for men who have sex with men in southern sub-Saharan Africa: A cross-sectional analysis by wave. *Sex Transm Infect*. 2016;**92**(4):292–8.
16. Ahmed S, Sabelli R, Simon K, Rosenberg N, Kavuta E, Harawa M, et al. Index case finding facilitates identification and linkage to care of children and young persons living with HIV/AIDS in Malawi. *Trop Med Int Heal*. 2017;**22**(8):1021–9.
17. Asiimwe S, Ross J, Arinaitwe A, Tumusiime O, Turyamureeba B, Roberts D, et al. Expanding HIV testing and linkage to care in southwestern Uganda with community health extension workers. *J Int AIDS Soc*. 2017;**20**(Suppl 4):21633.
18. Elul B, Lamb M, Lahuerta M, Abacassamo F, Ahoua L, Kujawski S, et al. A combination intervention strategy to improve linkage to and retention in HIV care following diagnosis in Mozambique: A cluster-randomized study. *PLoS Med*. 2017;**14**(11):e1002433.
19. Flynn A, Meya D, Hullsiek K, Rhein J, Williams D, Musubire A, et al. Evolving failures in the delivery of human immunodeficiency virus care: lessons from a Ugandan meningitis cohort 2006-2016. *Open Forum Infect Dis*. 2017;**4**(2):ofx077.
20. Grabowski M, Serwadda D, Gray R, Nakigozi G, Kigozi G, Kagaayi J, et al. HIV prevention efforts and incidence of HIV in Uganda. *N Engl J Med*. 2017;**377**(22):2154–66.

21. Hayes R, Floyd S, Schaap A, Shanaube K, Bock P, Sabapathy K, et al. A universal testing and treatment intervention to improve HIV control: One-year results from intervention communities in Zambia in the HPTN 071 (PopART) cluster-randomised trial. *PLoS Med.* 2017;**14**(5 PG):e1002292.
22. Hoffmann C, Mabuto T, Ginindza S, Fielding K, Kubeka G, Dowdy D, et al. Strategies to accelerate HIV Care and antiretroviral therapy initiation after HIV diagnosis: a randomized trial. *J Acquir Immune Defic Syndr.* 2017;**75**(5):540–7.
23. Kerrigan D, Mbwambo J, Likindikoki S, Beckham S, Mwampashi A, Shembilu C, et al. Project Shikamana: Baseline findings from a community empowerment-based combination HIV prevention trial among female sex workers in Iringa, Tanzania. *J Acquir Immune Defic Syndr.* 2017;**74**(Suppl 1):S60–8.
24. Laher A, Ariefdien N, Etlouba Y. HIV prevalence among first-presentation psychotic patients. *HIV Med.* 2017;**19**(4):271–9.
25. Lyons C, Ketende S, Diouf D, Drame F, Liestman B, Coly K, et al. Potential impact of integrated stigma mitigation interventions in improving HIV/AIDS service delivery and uptake for key populations in Senegal. *J Acquir Immune Defic Syndr.* 2017;**74**(Suppl 1):S52–9.
26. Mafigiri R, Matovu J, Makumbi F, Ndyanabo A, Nabukalu D, Sakor M, et al. HIV prevalence and uptake of HIV/AIDS services among youths (15-24 Years) in fishing and neighboring communities of Kasensero, Rakai district, southwestern Uganda. *BMC Public Health.* 2017;**17**(1):251.
27. Myburgh B, Nel R, Lategan-Potgieter R. Implementation of the prevention of mother-to-child transmission (PMTCT) program in the Northern Cape, South Africa. *Curr HIV Res.* 2017;**15**(1):38–45.
28. Ortblad K, Kibuuka Musoke D, Ngabirano T, Nakitende A, Magoola J, Kayiira P, et al. Direct provision versus facility collection of HIV self-tests among female sex workers in Uganda: A cluster-randomized controlled health systems trial. *PLoS Med.* 2017;**14**(11):e1002458.
29. Petersen M, Balzer L, Kwarsiima D, Sang N, Chamie G, Ayieko J, et al. Association of implementation of a universal testing and treatment intervention with HIV diagnosis, receipt of antiretroviral therapy, and viral suppression in east Africa. *JAMA.* 2017;**317**(21):2196–206.
30. Phiri S, Tweya H, van Lettow M, Rosenberg N, Trapence C, Kapito-Tembo A, et al. Impact of facility- and community-based peer support models on maternal uptake and retention in Malawi's option B+ HIV prevention of mother-to-child transmission program:

- A 3-arm cluster randomized controlled trial (PURE Malawi). *J Acquir Immune Defic Syndr*. 2017;**75**(Suppl 2):S140–8.
31. Rosenberg N, Graybill L, Wesevich A, McGrath N, Golin C, Maman S, et al. The impact of couples HIV testing and counseling on consistent condom use among pregnant women and their male partners: An observational study. *J Acquir Immune Defic Syndr*. 2017;**75**(4):417–25.
  32. Ruria E, Masaba R, Kose J, Woelk G, Mwangi E, Matu L, et al. Optimizing linkage to care and initiation and retention on treatment of adolescents with newly diagnosed HIV infection. *AIDS*. 2017;**31**(Suppl 3):S253–60.
  33. Ruzagira E, Grosskurth H, Kamali A, Baisley K. Brief counselling after home-based HIV counselling and testing strongly increases linkage to care: a cluster-randomized trial in Uganda. *J Int AIDS Soc*. 2017;**20**(2).
  34. Schwartz S, Lambert A, Phaswana-Mafuya N, Kose Z, McIngana M, Holland C, et al. Engagement in the HIV care cascade and barriers to antiretroviral therapy uptake among female sex workers in Port Elizabeth, South Africa: Findings from a respondent-driven sampling study. *Sex Transm Infect*. 2017;**93**(4):290–6.
  35. Vos A, Varkila M, Tempelman H, Devillé W, Barth R, Grobbee D, et al. The influence of HIV infection on pulmonary function in a rural african population. *Top Antivir Med*. 2017;**25**(1):276s-277s.
  36. Vu L, Burnett-Zieman B, Banura C, Okal J, Elang M, Ampwera R, et al. Increasing uptake of HIV, sexually transmitted infection, and family planning services, and reducing HIV-related risk behaviors among youth living with HIV in Uganda. *J Adolesc Heal*. 2017;**60**(Suppl 2):S22–8.
  37. Brown K, Williams D, Kinchen S, Saito S, Radin E, Patel H, et al. Status of HIV epidemic control among adolescent girls and young women aged 15-24 years - seven African countries, 2015-2017. *MMWR Morb Mortal Wkly Rep*. 2018;**67**(1):29–32.
  38. Chagomerana M, Miller W, Tang J, Hoffman I, Mthiko B, Phulusa J, et al. Optimizing prevention of HIV mother to child transmission: Duration of antiretroviral therapy and viral suppression at delivery among pregnant Malawian women. *PLoS One*. 2018;**13**(4):e0195033.
  39. Ephraim R, Ahadzie J, Adu P, Boachie J, Agbodzakey H, Adoba P, et al. Abnormal coagulation profile in people living with HIV-AIDS on combined antiretroviral therapy: findings from a case-control study in the Ho municipality, Ghana. *Pan Afr Med J*. 2018;**29**(121).
  40. Hansoti B, Stead D, Parrish A, Reynolds S, Redd A, Whalen M, et al. HIV testing in a



- South African emergency department: A missed opportunity. *PLoS One*. 2018;**13**(3):e0193858.
41. Hansoti B, Eisenberg A, Stead D, Mvandaba N, Patel E, Parrish A, et al. High incidence and burden of HIV infection in East London, South Africa. *Top Antivir Med*. 2018;**26**:424s.
  42. Holmes C, Sikazwe I, Sikombe K, Eshun-Wilson I, Czaicki N, Beres L, et al. Estimated mortality on HIV treatment among active patients and patients lost to follow-up in 4 provinces of Zambia: Findings from a multistage sampling-based survey. *PLoS Med*. 2018;**15**(1):e1002489.
  43. Moyo F, Haeri Mazanderani A, Bhardwaj S, Mhlongo O, Kufa T, Ng'Oma K, et al. Near-real-time tracking of gaps in prevention of mother-to-child transmission of HIV in three districts of Kwa-Zulu Natal province, South Africa. *S Afr Med J*. 2018;**108**(4):319–24.
  44. Mujugira A, Baeten J, Kidoguchi L, Haberer J, Celum C, Donnell D, et al. High levels of viral suppression among east African HIV-infected women and men in serodiscordant partnerships initiating antiretroviral therapy with high CD4 counts and during pregnancy. *AIDS Res Hum Retroviruses*. 2018;**34**(2):140–7.
  45. North C, Allen J, Okello S, Sentongo R, Kakuhikire B, Ryan E, et al. HIV infection, pulmonary tuberculosis, and COPD in rural Uganda: A cross-sectional study. *Lung*. 2018;**196**(1):49–57.
  46. Okawa S, Mwanza Kabaghe S, Mwiya M, Kikuchi K, Jimba M, Kankasa C, et al. Psychological well-being and adherence to antiretroviral therapy among adolescents living with HIV in Zambia. *AIDS Care*. 2018;**30**(5):634–42.
  47. Ousley J, Niyibizi A, Wanjala S, Vandenbulcke A, Kirubi B, Omwoyo W, et al. High proportions of patients with advanced HIV are antiretroviral therapy experienced: hospitalization outcomes from 2 sub-Saharan African sites. *Clin Infect Dis*. 2018;**66**(Suppl 2):S126–32.
  48. Seyoum M, Enawgaw B, Getaneh Z, Engidaye G, Asrie F, Melku M. Basic coagulation parameters among human immunodeficiency virus-infected adults in Gondar, northwest Ethiopia: a comparative cross-sectional study. *Biomed Res Int*. 2018;**Volume 201**.
  49. Ugboaja J, Oguejiofor C, Ogelle O. Highly active antiretroviral therapy and cervical cytologic abnormalities among women with HIV infection in a limited-resource setting. *Int J Gynaecol Obs*. 2018;**140**(2):228–32.
  50. Zhang Y, Fogel G, Guo X, Clarke W, Breaud A, Cummings V, et al. Antiretroviral drug use and HIV drug resistance among MSM and transgender women in sub-Saharan Africa. *AIDS*. 2018;**32**(10):1301–7.

51. Ayanga R, Namukwaya Z, Lugoloobi E, Mugerwa J, Afrika S, Kakande A, et al. Virological response among HIV-infected pregnant and lactating women initiated on option B+ attending the PMTCT program at Mulago national hospital, Kampala, Uganda. In: Proceedings of the 2015 International AIDS Conference. Vancouver, Canada; 2015.
52. Jain V, Chamie G, Amanyire G, Kwarisiim D, Kabami J, Chamie J, et al. Population-level HIV RNA and CD4+ distribution in a rural Ugandan community with widespread community HIV testing and universal ART access. In: Proceedings of the 2015 Conference on Retroviruses and Opportunistic Infections. Seattle, WA; 2015.
53. Rhein J. Detrimental outcomes of unmasking cryptococcal meningitis with recent ART initiation. *Open Forum Infect Dis.* 2018;**5**(8):ofy122.
54. Schwartz S. Safer conception delayed by lack of HIV viral suppression. In: Proceedings of the 2015 International AIDS Conference. Vancouver, Canada; 2015.
55. Aston S, Ho A, Jary H, Everett D, Mwandumba H, Heyderman R, et al. Aetiology and outcome of community-acquired pneumonia in HIV-infected Malawian adults. In: Proceedings of the 2016 Conference on Retroviruses and Opportunistic Infections. Boston, MA; 2016.
56. Casavant D, Honwana I, MacKellar R, Thompson R, Nelson J, Bonzela B, et al. Home-based HIV testing and new HIV diagnoses in Chókwè District, Mozambique. In: Proceedings of the 2016 Conference on Retroviruses and Opportunistic Infections. Boston, MA; 2016.
57. Kharsany A, Cawood C, Khanyile D, Grobler A, Puren A, Kufa-Chakeza T, et al. Strengthening HIV surveillance in the antiretroviral therapy era: Baseline findings of HIV prevalence and incidence from KwaZulu-Natal, South Africa. In: Proceedings of the 2016 International AIDS Conference. Durban, South Africa; 2016.
58. Lahuerta P, Bouyagui T, Patnaik N, Telly J, Knox T, Ballo A. HIV prevalence and risk factors in men who have sex with men in Bamako, Mali. In: Proceedings of the 2016 Conference on Retroviruses and Opportunistic Infections. Boston, MA; 2016.
59. MacLeod D, Tshepo W, Bor J, Fraser N, Shubber Z, Sanne I, et al. Measuring viral load suppression in South Africa using a novel, national database. In: Proceedings of the 2016 Conference on Retroviruses and Opportunistic Infections. Boston, MA; 2016.
60. ICAP at Columbia University. Malawi population-based HIV impact assessment (MPHIA). New York City; 2016.
61. ICAP at Columbia University. Tanzania HIV impact survey (THIS). New York City; 2016.

62. ICAP at Columbia University. Uganda population-based HIV impact assessment (UPHIA). New York City; 2016.
63. ICAP at Columbia University. Zambia population-based HIV impact assessment (ZAMPHIA). New York City; 2016.
64. ICAP at Columbia University. Zimbabwe population-based HIV impact assessment (ZIMPHIA). New York City; 2016.
65. Ribakare M, Nsanzimana M, Ndahimana J, Rusisiro B, Niyibizi G, Uwizihiwe J, et al. Feasibility of the third 90-90-90 target: Viral load coverage and outcomes in Rwanda. In: Proceedings of the 2016 Conference on Retroviruses and Opportunistic Infections. Boston, MA; 2016.
66. Tippett Barr B, Schouten E, van Oosterhout J, Gupta S, Phiri H, Thindwa D. National HIV transmission in 4-12 week olds in Malawi's PMTCT option B+ program. In: Proceedings of the 2016 Conference on Retroviruses and Opportunistic Infections. Boston, MA; 2016.
67. Abuogi L, Akama E, Nimz A, Blat C, Cohen C, Oyaró P. Retention and viral suppression of newly diagnosed and known HIV-positive pregnant women on option B+ in Kenya. In: Proceedings of the 2017 International AIDS Conference. Paris, France; 2017.
68. Breton G, Ndawinz J, Nimbona P, O'Sylla J, Akamba M, Mbangue S, et al. HIV viral load monitoring in four west and central African countries: How is virological failure managed by caregivers in the OPP-ERA project? In: Proceedings of the 2017 International AIDS Conference. Paris, France; 2017.
69. Couderc C, Dah T, Diallo F, Kouamé M, Agboyibor R, Bernier A, et al. Feasibility and acceptability of immediate ART initiation in MSM in west Africa (CohMSM ANRS 12324 - Expertise France). In: Proceedings of the 2017 International AIDS Conference. Paris, France; 2017.
70. Kharsany A, Cawood C, Khanyile D, Grobler A, Lewis L, Puren A. Population HIV viral load metrics: Findings from household surveys in KwaZulu-Natal, South Africa. In: Proceedings of the 2017 International AIDS Conference. Paris, France; 2017.
71. Kiene S, Naigino R, Sileo K, Kalichman S, Menzies N, Bategenya M, et al. Only 36% of adults living with HIV aware of their HIV+ status but progress in ART coverage and viral suppression in a subnational survey in Uganda: Progress towards UNAIDS 90-90-90. In: Proceedings of the 2017 International AIDS Conference. Paris, France; 2017.
72. Malaba T, Newell M, Madlala H, Perez A, Gray C, Myer L. Methods of gestational age (GA) assessment influence the observed association between ART exposure and preterm delivery (PTD): A prospective study in Cape Town, South Africa. In: Proceedings of the

- 2017 International AIDS Conference. Paris, France; 2017.
73. Mendelsohn S, Aluda C, Ortuno R, Shigayeva A, Hilderband K, Goemaere E. HIV and tuberculosis in Malawian prisons: A comprehensive prevention, screening and management programme. In: Proceedings of the 2017 International AIDS Conference. Paris, France; 2017.
  74. Mutenda N, Taffa N, Baughman D, Agovi A, De Klerk M, Sawadogo S, et al. Outcomes of routine viral load monitoring in Namibia's national antiretroviral treatment program. In: Proceedings of the 2017 International AIDS Conference. Paris, France; 2017.
  75. Ndagire H, Kazibwe F, Ajok F, Mugume A. The role of peer-to-peer model in achieving 90-90-90 among female sex workers in east central Uganda. In: Proceedings of the 2017 International AIDS Conference. Paris, France; 2017.
  76. Nicholas S, Schramm B, Poulet E, Ajule E, Candiru H, Adroa P, et al. Viral load monitoring with SAMBA-1, a semi-quantitative nearly point-of-care method in Arua, a rural district in Uganda. In: Proceedings of the 2017 International AIDS Conference. Paris, France; 2017.
  77. Nikuze A, Wanjala S, Ben-Farhat J, Omwoyo W, O'Alliance L. HIV incidence, cascade, and testing among mothers in western Kenya. In: Proceedings of the 2017 Conference on Retroviruses and Opportunistic infections. Seattle; 2017.
  78. Nsumba M, Zimaze R, Kaimal A, Bakabikoba H, Mubiru F, Lamorde M, et al. Risk factors for viral failure among HIV patients on antiretroviral therapy (ART) at the Infectious Diseases Institute Kampala Uganda. In: Proceedings of the 2017 International AIDS Conference. Paris, France; 2017.
  79. Olang'o P, Mwimali P, Karuga R, Seii M. Tit integration of HIV testing and prevention services among men who have sex with men (MSM) in the government owned health facilities in western Kenya. In: Proceedings of the 2017 International AIDS Conference. Paris, France; 2017.
  80. Pathmanathan I, Pasipamire M, Pals S, Dokubo E, Preko P, Ao T, et al. High uptake of antiretroviral therapy among HIV-positive TB patients receiving co-located services in Swaziland. In: Proceedings of the 2017 International AIDS Conference. Paris, France; 2017.
  81. ICAP at Columbia University. Lesotho population-based HIV impact assessment (LePHIA). New York City; 2017.
  82. ICAP at Columbia University. Swaziland HIV incidence measurement survey 2 - A population-based HIV impact assessment (SHIMS2). New York City; 2017.

83. Dadabhai S, Gadama L, Chamanga R, Kawalazira R, Katumbi C, Dula D, et al. Pregnancy outcomes in the era of universal HAART in Africa (The POISE Study). In: Proceedings of the 2018 Conference on Retroviruses and Opportunistic Infections. Boston, MA; 2018.
84. Hoffmann C, Milovanovic M, Kerrigan D, Martinson N, Variava E. Post-hospital mortality and readmission among HIV-infected adults in South Africa. In: Proceedings of the 2018 Conference on Retroviruses and Opportunistic Infections. Boston, MA; 2018.
85. Human Sciences Research Council. The fifth South African national HIV prevalence, incidence, behaviour and communication survey, 2017 (SABSSM V). Pretoria, South Africa; 2017.
86. Matthews L, Orrell C, Bwana B, Asimwe S, Amanyire G, Musinguzi N, et al. ART adherence among pregnant and non-pregnant women in S. Africa and Uganda. In: Proceedings of the 2018 Conference on Retroviruses and Opportunistic Infections. Boston, MA; 2018.
87. ICAP at Columbia University. Cameroon HIV impact assessment (CAMPHIA). 2018.
88. ICAP at Columbia University. Cote d'Ivoire HIV impact assessment (CIPHIA). 2018.
89. ICAP at Columbia University. Namibia HIV impact assessment (NAMPHIA). 2018.
90. ICAP at Columbia University. Ethiopia HIV impact assessment (EPHIA). 2018.
91. Price J, Vwalika B, Winston J, Kasaro M, Mwape H, Chi B, et al. Preconceptional ART and spontaneous preterm birth in an urban Zambian cohort. In: Proceedings of the 2018 Conference on Retroviruses and Opportunistic Infections. Boston, MA; 2018.
92. Zielinski-Gutierrez E, Odongo S, Kwaro D, Mutai K. Fisherfolk at higher risk than their neighbors: findings from western Kenya. In: Proceedings of the 2018 Conference on Retroviruses and Opportunistic Infections. Boston, MA; 2018.
