# Supplementary material for: Evidence of sociodemographic heterogeneity across the HIV treatment cascade and progress towards 90‐90‐90 in sub‐Saharan Africa – a systematic review and meta‐analysis
Source: PubMed Central journal article supplement (PMC7062634; doi:10.1002/jia2.25470), 2020-03-09
Supplement: JIA2-23-e25470-s003.pdf [file JIA2-23-e25470-s003.pdf]

### Additional File 3: Risk of Bias Assessment

Below are summary and detailed findings of the risk of bias assessment for included peer-reviewed articles as well as population-based surveys.

**Figure 1:** Overall and Domain-Specific Distribution of Risk of Bias for Included Peer-Reviewed and Population-Based Surveys

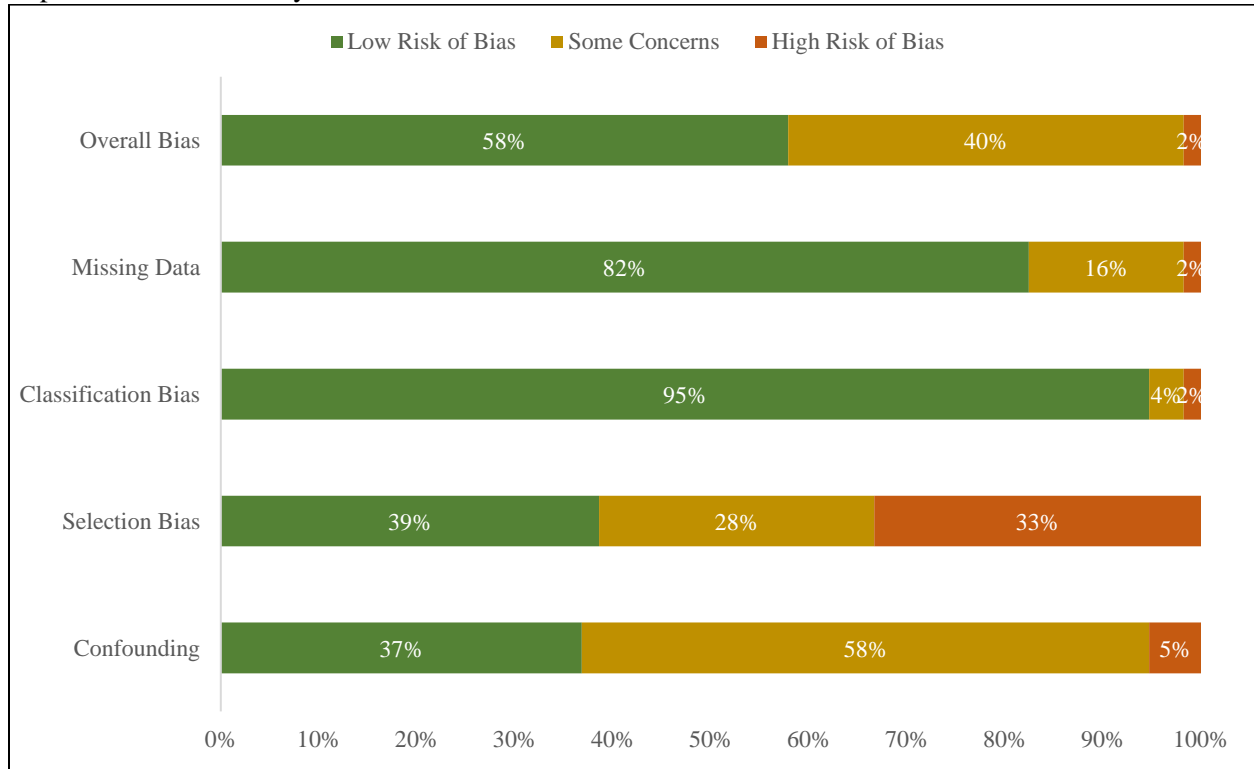

**Table 1: Detailed Risk of Bias Assessment Findings by Domain**

| Author                          | Year | Confounding       | Selection Bias    | Classification Bias | Missing Data      | Overall Bias      |
|---------------------------------|------|-------------------|-------------------|---------------------|-------------------|-------------------|
| Ahmed                           | 2017 | Some Concerns     | High Risk of Bias | Low Risk of Bias    | Low Risk of Bias  | Some Concerns     |
| Asiimwe                         | 2017 | Some Concerns     | Low Risk of Bias  | Low Risk of Bias    | Low Risk of Bias  | Low Risk of Bias  |
| Baeten                          | 2016 | Some Concerns     | High Risk of Bias | Low Risk of Bias    | Low Risk of Bias  | Some Concerns     |
| Barnabas                        | 2016 | Some Concerns     | High Risk of Bias | Low Risk of Bias    | Low Risk of Bias  | Some Concerns     |
| Boyer                           | 2016 | Some Concerns     | High Risk of Bias | Low Risk of Bias    | Low Risk of Bias  | Some Concerns     |
| Brown                           | 2018 | Low Risk of Bias  | Low Risk of Bias  | Low Risk of Bias    | Low Risk of Bias  | Low Risk of Bias  |
| Chanda                          | 2017 | Some Concerns     | High Risk of Bias | Low Risk of Bias    | Low Risk of Bias  | Some Concerns     |
| Charurat                        | 2015 | Some Concerns     | High Risk of Bias | Low Risk of Bias    | Some Concerns     | Some Concerns     |
| Collins                         | 2016 | Low Risk of Bias  | High Risk of Bias | Low Risk of Bias    | Low Risk of Bias  | Low Risk of Bias  |
| Elul                            | 2017 | Some Concerns     | Some Concerns     | Low Risk of Bias    | Some Concerns     | Some Concerns     |
| Flynn                           | 2017 | Some Concerns     | High Risk of Bias | Low Risk of Bias    | Low Risk of Bias  | Some Concerns     |
| Gaolathe                        | 2016 | Low Risk of Bias  | Low Risk of Bias  | Low Risk of Bias    | Low Risk of Bias  | Low Risk of Bias  |
| Grabowski                       | 2017 | Low Risk of Bias  | Low Risk of Bias  | Low Risk of Bias    | Low Risk of Bias  | Low Risk of Bias  |
| Grobler                         | 2018 | Low Risk of Bias  | Low Risk of Bias  | Low Risk of Bias    | Low Risk of Bias  | Low Risk of Bias  |
| Hayes                           | 2017 | Low Risk of Bias  | Low Risk of Bias  | Low Risk of Bias    | Low Risk of Bias  | Low Risk of Bias  |
| Hoffman                         | 2017 | Some Concerns     | Some Concerns     | Low Risk of Bias    | Low Risk of Bias  | Low Risk of Bias  |
| Holmes                          | 2018 | Some Concerns     | Low Risk of Bias  | Low Risk of Bias    | Low Risk of Bias  | Low Risk of Bias  |
| Kerrigan                        | 2017 | Some Concerns     | High Risk of Bias | Some Concerns       | Low Risk of Bias  | Some Concerns     |
| LaHer                           | 2018 | High Risk of Bias | High Risk of Bias | Low Risk of Bias    | Low Risk of Bias  | Some Concerns     |
| Lancaster                       | 2016 | Some Concerns     | High Risk of Bias | High Risk of Bias   | Low Risk of Bias  | High Risk of Bias |
| Lyons                           | 2017 | Some Concerns     | High Risk of Bias | Some Concerns       | Low Risk of Bias  | Some Concerns     |
| Mafigiri                        | 2017 | Some Concerns     | Some Concerns     | Low Risk of Bias    | Low Risk of Bias  | Low Risk of Bias  |
| Mujugira                        | 2018 | Some Concerns     | Some Concerns     | Low Risk of Bias    | Low Risk of Bias  | Low Risk of Bias  |
| Myburgh                         | 2017 | High Risk of Bias | Some Concerns     | Low Risk of Bias    | Low Risk of Bias  | Some Concerns     |
| Myer                            | 2015 | Some Concerns     | Some Concerns     | Low Risk of Bias    | Low Risk of Bias  | Low Risk of Bias  |
| North                           | 2018 | Some Concerns     | High Risk of Bias | Low Risk of Bias    | Low Risk of Bias  | Some Concerns     |
| Ortblad                         | 2017 | Some Concerns     | High Risk of Bias | Low Risk of Bias    | Some Concerns     | Some Concerns     |
| Petersen                        | 2017 | Low Risk of Bias  | Low Risk of Bias  | Low Risk of Bias    | Low Risk of Bias  | Low Risk of Bias  |
| Phiri                           | 2017 | Some Concerns     | Some Concerns     | Low Risk of Bias    | Some Concerns     | Some Concerns     |
| Rao                             | 2016 | High Risk of Bias | High Risk of Bias | Low Risk of Bias    | Low Risk of Bias  | Some Concerns     |
| Rosenberg                       | 2015 | Some Concerns     | Some Concerns     | Low Risk of Bias    | Low Risk of Bias  | Low Risk of Bias  |
| Rosenberg                       | 2017 | Some Concerns     | Some Concerns     | Low Risk of Bias    | Low Risk of Bias  | Low Risk of Bias  |
| Ruria                           | 2017 | Some Concerns     | Some Concerns     | Low Risk of Bias    | Low Risk of Bias  | Low Risk of Bias  |
| Ruzagira                        | 2017 | Low Risk of Bias  | Low Risk of Bias  | Low Risk of Bias    | Some Concerns     | Low Risk of Bias  |
| Schwartz                        | 2017 | Some Concerns     | High Risk of Bias | Low Risk of Bias    | Low Risk of Bias  | Some Concerns     |
| Stahlman                        | 2016 | Some Concerns     | High Risk of Bias | Low Risk of Bias    | Some Concerns     | Some Concerns     |
| Ugbaoya                         | 2018 | Some Concerns     | Some Concerns     | Low Risk of Bias    | Low Risk of Bias  | Low Risk of Bias  |
| Okawa                           | 2018 | Some Concerns     | Some Concerns     | Low Risk of Bias    | Low Risk of Bias  | Low Risk of Bias  |
| Chagomerana                     | 2018 | Low Risk of Bias  | Some Concerns     | Low Risk of Bias    | Some Concerns     | Low Risk of Bias  |
| Moyo                            | 2018 | Some Concerns     | Some Concerns     | Low Risk of Bias    | Some Concerns     | Some Concerns     |
| Ousley                          | 2018 | Some Concerns     | Some Concerns     | Low Risk of Bias    | Some Concerns     | Some Concerns     |
| Hansoti                         | 2018 | Some Concerns     | Some Concerns     | Low Risk of Bias    | High Risk of Bias | Some Concerns     |
| Seyoum                          | 2018 | Some Concerns     | Low Risk of Bias  | Low Risk of Bias    | Low Risk of Bias  | Low Risk of Bias  |
| Zhang                           | 2018 | Some Concerns     | High Risk of Bias | Low Risk of Bias    | Low Risk of Bias  | Some Concerns     |
| Ephraim                         | 2018 | Some Concerns     | High Risk of Bias | Low Risk of Bias    | Low Risk of Bias  | Some Concerns     |
| <b>Population-Based Surveys</b> |      |                   |                   |                     |                   |                   |
| SABSSMV                         | 2017 | Low Risk of Bias  | Low Risk of Bias  | Low Risk of Bias    | Low Risk of Bias  | Low Risk of Bias  |
| Cameroon PHIA                   | 2018 | Low Risk of Bias  | Low Risk of Bias  | Low Risk of Bias    | Low Risk of Bias  | Low Risk of Bias  |
| Cote d'Ivoire PHIA              | 2018 | Low Risk of Bias  | Low Risk of Bias  | Low Risk of Bias    | Low Risk of Bias  | Low Risk of Bias  |
| Nambia PHIA                     | 2018 | Low Risk of Bias  | Low Risk of Bias  | Low Risk of Bias    | Low Risk of Bias  | Low Risk of Bias  |
| Ethiopia PHIA                   | 2018 | Low Risk of Bias  | Low Risk of Bias  | Low Risk of Bias    | Low Risk of Bias  | Low Risk of Bias  |
| Lesotho PHIA                    | 2017 | Low Risk of Bias  | Low Risk of Bias  | Low Risk of Bias    | Low Risk of Bias  | Low Risk of Bias  |
| Malawi PHIA                     | 2016 | Low Risk of Bias  | Low Risk of Bias  | Low Risk of Bias    | Low Risk of Bias  | Low Risk of Bias  |
| Swaziland PHIA                  | 2017 | Low Risk of Bias  | Low Risk of Bias  | Low Risk of Bias    | Low Risk of Bias  | Low Risk of Bias  |
| Tanzania PHIA                   | 2017 | Low Risk of Bias  | Low Risk of Bias  | Low Risk of Bias    | Low Risk of Bias  | Low Risk of Bias  |
| Uganda PHIA                     | 2017 | Low Risk of Bias  | Low Risk of Bias  | Low Risk of Bias    | Low Risk of Bias  | Low Risk of Bias  |
| Zambia PHIA                     | 2016 | Low Risk of Bias  | Low Risk of Bias  | Low Risk of Bias    | Low Risk of Bias  | Low Risk of Bias  |
| Zimbabwe PHIA                   | 2016 | Low Risk of Bias  | Low Risk of Bias  | Low Risk of Bias    | Low Risk of Bias  | Low Risk of Bias  |
